# Supplementary material for: Development of a Human Breast-Cancer Derived Cell Line Stably Expressing a Bioluminescence Resonance Energy Transfer (BRET)-Based Phosphatidyl Inositol-3 Phosphate (PIP3) Biosensor
Source: PubMed Central journal article supplement (PMC3960261; doi:10.1371/journal.pone.0092737), 2014-03-19
Supplement: pone.0092737.s002.pdf [file pone.0092737.s002.pdf]

## Supplementary Figure S2

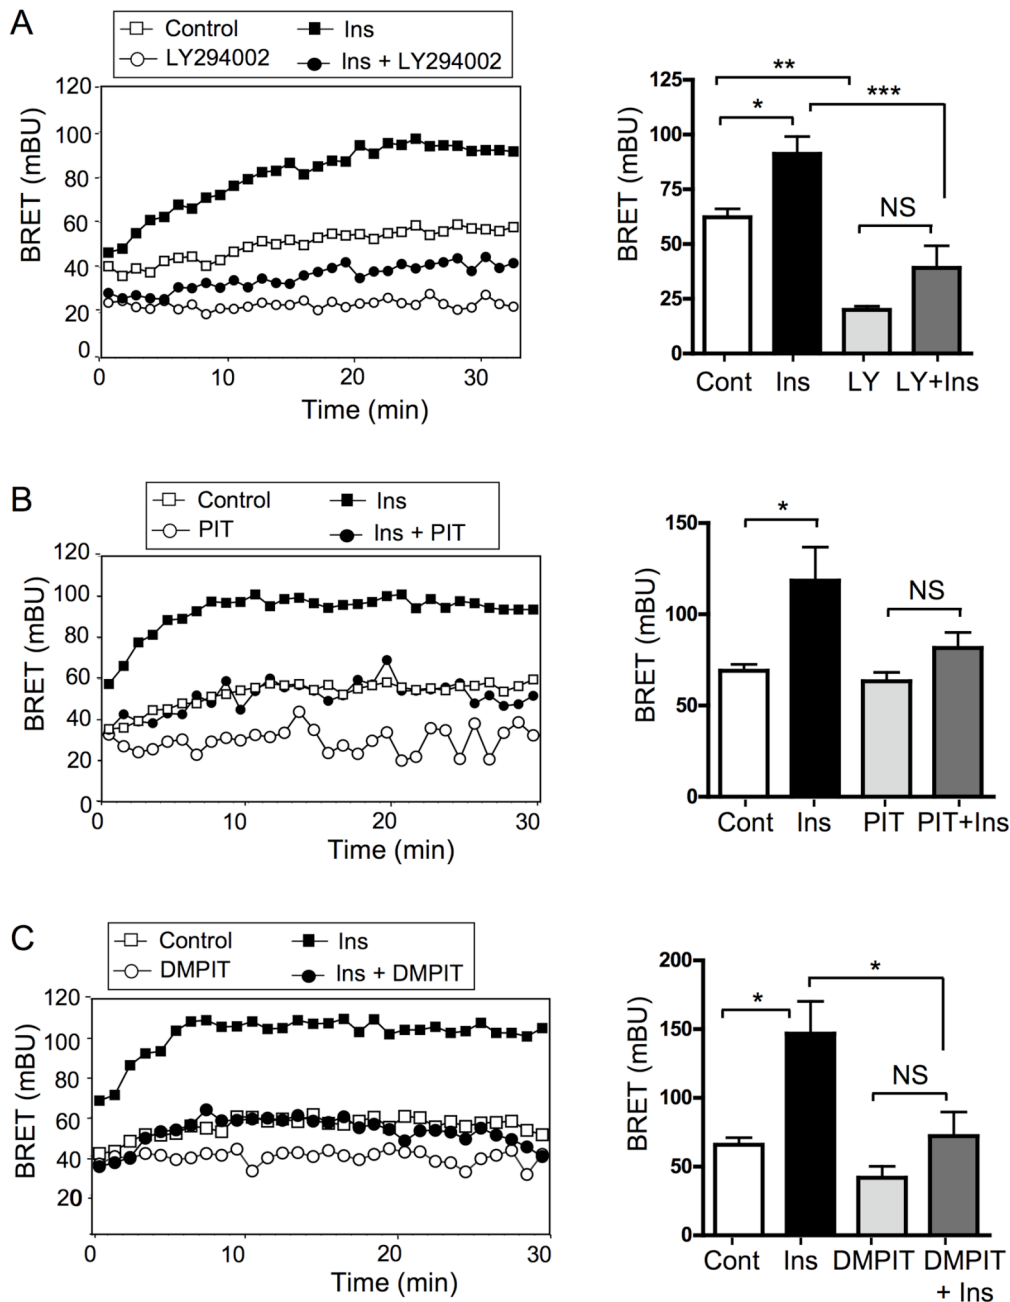

### Supplementary Figure S2: Effect of inhibitors of PI3K signaling on insulin-stimulated PIP<sub>3</sub> production in MCF-7/B2 cells.

(A) MCF-7/B2 cells were preincubated for 1h in absence or presence of 25 $\mu$ M of the PI3K inhibitor LY294002. Cells were then stimulated with 10nM insulin and light emission acquisition started immediately. A typical real-time BRET experiment (left panel) and the mean  $\pm$  SEM of BRET values at the plateau (right panel) of 4 independent experiments are shown. (B, C) MCF-7/B2 cells were preincubated for 4h in absence or presence of 10 $\mu$ M of the inhibitors of Akt-PH/ PIP<sub>3</sub> interaction PIT-1 (B) and DMPIT-1 (C). Cells were then stimulated with 10 nM insulin, and light emission acquisition started immediately. Typical real-time BRET experiments (left panels) and mean  $\pm$  SEM of BRET values at the plateau (right panels) of 3 to 5 independent experiments are shown. Statistical analysis was performed using ANOVA followed by Tukey's test. \*, P < 0.05; \*\*, P < 0.01; \*\*\*, P < 0.001; NS, Non significant.
